# Supplementary material
Source: PubMed Central journal article supplement (PMC5910187)
Supplement: NIHMS944198-supplement-1.pdf [file NIHMS944198-supplement-1.pdf]

Supporting Information for:

**Tracing the ‘9<sup>th</sup> Sulfur’ of the Nitrogenase Cofactor via a Semi-Synthetic Approach**

Kazuki Tanifuji,<sup>1</sup> Chi Chung Lee,<sup>1</sup> Nathaniel S. Sickerman,<sup>1</sup> Kazuyuki Tatsumi,<sup>2</sup> Yasuhiro Ohki,<sup>2</sup> Yilin Hu,<sup>1,\*</sup> and Markus W. Ribbe<sup>1,3,\*</sup>

<sup>1</sup> Department of Molecular Biology and Biochemistry, University of California, Irvine, California 92697-3900

<sup>2</sup> Department of Chemistry, Graduate School of Science and Research Center for Materials Science, Nagoya University, Furo-cho, Chikusa-ku, Nagoya 464-8602, Japan

<sup>3</sup> Department of Chemistry, University of California, Irvine, California 92697-2025

\*Correspondence should be addressed to [mribbe@uci.edu](mailto:mribbe@uci.edu) or [yilinh@uci.edu](mailto:yilinh@uci.edu).

## Table of Contents

### Supplementary Methods

|                                      |   |
|--------------------------------------|---|
| Cell Growth and Protein Purification | 3 |
| EPR Analysis                         | 4 |
| ICP-OES Analysis                     | 4 |
| Activity Assays of NifH              | 5 |
| SAM Cleavage Assays                  | 5 |
| Cluster Maturation Assays            | 6 |
| Acid Quench Experiments              | 7 |

|                          |   |
|--------------------------|---|
| Supplementary References | 8 |
|--------------------------|---|

### Supplementary Figures

|                        |    |
|------------------------|----|
| Supplementary Figure 1 | 10 |
| Supplementary Figure 2 | 10 |
| Supplementary Figure 3 | 11 |
| Supplementary Figure 4 | 11 |
| Supplementary Figure 5 | 12 |
| Supplementary Figure 6 | 13 |

## Supplementary Methods

Unless otherwise specified, all chemicals were purchased from Sigma-Aldrich (St. Louis, MO) and Thermo Fisher Scientific (Waltham, MA).  $^{35}\text{S}$ -labelled sodium sulfite ( $\text{Na}_2^{35}\text{SO}_3$ ) was purchased from Moravek, Inc (Brea, CA). For chemical synthesis, all reactions were performed under an  $\text{N}_2$  atmosphere using Schlenk techniques and a glove box operating at  $<1$  ppm  $\text{H}_2\text{O}$  and  $\text{O}_2$ . Electronic absorption was measured with an Evolution 260 BIO UV-visible spectrometer (Thermo Fisher) using a 1 cm cuvette. All solvents were purified before use by passing through columns of activated alumina and a supported copper catalyst.  $[\text{PPh}_4]_2[\text{Fe}_4\text{S}_4(\text{SEt})_4]$  was prepared as described elsewhere<sup>1</sup> and used as the precursor for the synthesis of  $[\text{PPh}_4]_2[\text{Fe}_4\text{S}_4(\text{SCH}_2\text{CH}_2\text{OH})_4]$  (designated  $[\text{PPh}_4]_2[\text{Fe}_4\text{S}_4]^{\text{Syn}}$ ) using a protocol slightly modified from a previously described procedure.<sup>2</sup> 2-Mercaptoethanol (BME) was degassed by three freeze-pump-thaw cycles prior to use. For biochemical experiments, unless otherwise noted, all manipulations were performed under an Ar atmosphere using Schlenk techniques and a glove box operating at  $<3$  ppm  $\text{O}_2$ . Aqueous solutions of europium(II) diethylenetriaminepentaacetic acid ( $\text{Eu}^{\text{II}}$ -DTPA) or europium(II) ethyleneglycol-bis(2-aminomethylether)-*N,N,N',N'*-tetraacetic acid ( $\text{Eu}^{\text{II}}$ -EGTA) were prepared immediately before use as described earlier.<sup>3</sup>

**Cell Growth and Protein Purification.** An *Escherichia coli* strain (YM114EE) expressing His-tagged NifB of *Methanosarcina acetivorans* (*MaNifB*) was grown and harvested as described elsewhere.<sup>4</sup> Published methods were used to purify *MaNifB*.<sup>4</sup> *Azotobacter vinelandii* strains (YM9A, DJ1143 and DJ1141) expressing His-tagged  $\Delta nifB$  NifEN (designated NifEN<sup>apo</sup>), His-tagged  $\Delta nifB$  NifDK (designated NifDK<sup>apo</sup>), His-tagged wildtype NifDK (designated NifDK<sup>holo</sup>) and non-tagged wildtype NifH (designated NifH<sup>holo</sup>), respectively, were grown and harvested as described earlier.<sup>5-8</sup> Published methods were used

to purify NifEN<sup>apo</sup>, NifDK<sup>apo</sup>, NifDK<sup>holo</sup> and NifH<sup>holo</sup>.<sup>5-8</sup>

**EPR Analysis.** The EPR samples were prepared in a Vacuum Atmospheres glove box and flash frozen in liquid nitrogen prior to analysis. The DT-reduced samples contained 2 mM DT, 50 mM Tris-HCl (pH 8.0), 500 mM NaCl and 10% (v/v) glycerol. The indigo disulfonate (IDS)-oxidized samples were prepared by incubating the DT-reduced samples with excess IDS for 5 min, followed by removal of excess IDS using a Sephadex G-25 desalting column. The super-reduced samples were prepared by incubating the DT-reduced sample with excess Eu<sup>II</sup>-DTPA for 20 min, followed by removal of excess Eu<sup>II</sup>-DTPA using a Sephadex G-25 desalting column. The NifH samples contained either no nucleotide or 5 mM ATP or ADP; whereas the *MaNifB* samples contained either no SAM or 10 mM SAM. The DT-free *MaNifB* samples contained 2 mM Eu<sup>II</sup>-EGTA and either no additive or 10 mM SAM with or without 2 mM sodium sulfite (Na<sub>2</sub>SO<sub>3</sub>). EPR spectra were recorded by an ESP 300 E<sub>z</sub> spectrophotometer (Bruker) interfaced with an ESR-9002 liquid-helium continuous-flow cryostat (Oxford Instruments) using a microwave power of 50 mW, a gain of 5×10<sup>4</sup>, a modulation frequency of 100 kHz, and a modulation amplitude of 5 G. Five scans were recorded for each EPR sample at a temperature of 10 K and a microwave frequency of 9.62 GHz (*see* Fig. 2b; Fig. 3c, d; Supplementary Fig. 1).

**Inductively Coupled Plasma Optical Emission Spectroscopy (ICP-OES) Analysis.** The metal contents of NifH<sup>holo</sup>, NifH<sup>apo</sup>, and NifH<sup>[Fe<sub>4</sub>S<sub>4</sub>]</sup> were determined by inductively coupled plasma optical emission spectroscopy (ICP-OES) using a Thermo Scientific iCAP7000 (Thermo Electron North America LLC, Madison, WI). Stock solution of Fe (1000 mg·L<sup>-1</sup>) was diluted to make standard solutions for calibration. Each protein sample was mixed with 100 μL concentrated H<sub>2</sub>SO<sub>4</sub> and 100 μL concentrated HNO<sub>3</sub>, and subsequently refluxed at

250°C for 30 min. This procedure was repeated until the solution became colorless, followed by cooling of the solution to room temperature and dilution of this solution with a 2% (w/w) HNO<sub>3</sub> solution to a total volume of 6 mL for ICP-OES measurement.

**Activity Assays of NifH.** Activity assays of the NifH samples (*see* Supplementary Fig. 1) were carried out as described earlier.<sup>9</sup> The products of the reactions were analyzed as described previously.<sup>8-10</sup>

**SAM Cleavage Assays.** The SAM cleavage assays contained, in a total volume of 0.5 ml, 25 mM Tris-HCl (pH 8.0), 2 mM DT, 5% (v/v) glycerol, 8 nmol *MaNifB*<sup>apo</sup> or *MaNifB*<sup>[Fe<sub>4</sub>S<sub>4</sub>]</sup>, and 8 nmol SAM (*see* Fig. 2a). The DT-free assays contained the same components except for the substitution of 0.3 mM Eu<sup>II</sup>-EGTA and 8 nmol DT-free *MaNifB*<sup>[Fe<sub>4</sub>S<sub>4</sub>]</sup>, respectively, for DT and the DT-containing *MaNifB* sample, with or without addition of 0.5 mM Na<sub>2</sub>SO<sub>3</sub> (*see* Fig. 3b). Assays were incubated at 25°C for 30 min with intermittent mixing, before being terminated by filtration with Amicon Ultra 30,000 MWCO centrifugal filters. Trifluoroacetic acid was supplemented at a concentration of 0.14% (w/w) to the filtered samples before the samples were analyzed using a Thermo Scientific Dionex Ultimate 3000 UHPLC system with an Acclaim 120 C18 column (4.6×100 mm, 5-μm particle size). The column was equilibrated with 98% buffer A (50 mM KH<sub>2</sub>PO<sub>4</sub>, pH 6.6) and 2% buffer B (100% methanol). Following each 100-μl injection of sample, a linear gradient of 60–95% buffer B was applied over 20 min, followed by 8 min of isocratic flow with 95% buffer B and a linear gradient of 95–2% buffer B over 3 min. The buffer flow rate was 0.5 ml/min throughout each run and the column was maintained at 30°C. The column was then equilibrated for 5 min with 2% buffer B before subsequent sample injections. The elution of SAM, *S*-adenosyl-L-homocysteine (SAH), and 5'-deoxyadenosine (5'-dAH) were monitored by UV absorption at 254 nm, and

the respective compounds were identified by comparing their retention times with those of the known standards.

**Cluster Maturation Assays.** Cluster maturation assays were conducted using the SAM-treated *MaNifB*<sup>[Fe<sub>4</sub>S<sub>4</sub>]</sup> as an L-cluster source in the presence or absence of DT. The DT-containing assays (*see* Fig. 2c) contained, in a total volume of 1 mL, 84 nmol *MaNifB*<sup>[Fe<sub>4</sub>S<sub>4</sub>]</sup>, 10 nmol NifEN<sup>apo</sup>, 22 nmol NifH<sup>holo</sup>, 2.0 nmol NifDK<sup>apo</sup>, 20 mM DT, 5 mM SAM, 0.5 mM homocitrate, 0.25 mM sodium molybdate (Na<sub>2</sub>MoO<sub>4</sub>), 0.8 mM Na<sub>2</sub>ATP, 1.7 mM MgCl<sub>2</sub>, 10 mM creatine phosphate, 8 units of creatine phosphokinase, and 50 mM Tris-HCl (pH 8.0). This mixture was incubated at 30°C for 30 min before it was examined for enzymatic activities as described previously.<sup>4</sup> The DT-free assay (*see* Fig. 3e) was initiated with incubation of 42 nmol DT-free *MaNifB*<sup>[Fe<sub>4</sub>S<sub>4</sub>]</sup> with 2 mM Na<sub>2</sub>SO<sub>3</sub>, 2 mM Eu<sup>II</sup>-EGTA, 5 mM SAM, 50 mM Tris-HCl (pH 8.0) and 10% (v/v) glycerol in a total volume of 450 μL at room temperature for 5 min. The “-SAM, -SO<sub>3</sub><sup>2-</sup>” or “+SAM, -SO<sub>3</sub><sup>2-</sup>” control (*see* Fig. 3e) contained the same components as those of the DT-free assay except for the absence of both SAM and Na<sub>2</sub>SO<sub>3</sub>, or the absence of Na<sub>2</sub>SO<sub>3</sub> alone; whereas the “no sulfur” control and the “sulfate”, “sulfide” and “DT” samples (*see* Supplementary Fig. 2) contained the same components as those of the DT-free assay except for the substitution of no additive, 2 mM MgSO<sub>4</sub>, 2 mM Na<sub>2</sub>S, and 2 mM DT, respectively, for Na<sub>2</sub>SO<sub>3</sub>. Following the incubation, the mixture was combined with a 900-μL mixture containing 10 nmol NifEN<sup>apo</sup>, 22 nmol NifH<sup>holo</sup>, 2.0 nmol NifDK<sup>apo</sup>, 2 mM Eu<sup>II</sup>-EGTA, 5 mM SAM, 0.5 mM homocitrate, 0.25 mM Na<sub>2</sub>MoO<sub>4</sub>, 0.8 mM Na<sub>2</sub>ATP, 1.7 mM MgCl<sub>2</sub>, 10 mM creatine phosphate, 8 units of creatine phosphokinase, and 50 mM Tris-HCl (pH 8.0). This reaction mixture was incubated at 30°C for 30 min, terminated with addition of 0.4 mM ammonium tetrathiomolybdate [(NH<sub>4</sub>)<sub>2</sub>MoS<sub>4</sub>], and examined for the enzymatic activity under 10% C<sub>2</sub>H<sub>2</sub>.

To confirm the generation of L-cluster on *Ma*NifB<sup>[Fe<sub>4</sub>S<sub>4</sub>]</sup> in the presence of Na<sub>2</sub>SO<sub>3</sub> (*see* Fig. 3a, *right*), the NifB-bound cluster species was extracted from a 120- $\mu$ L mixture containing 67 nmol DT-free *Ma*NifB<sup>[Fe<sub>4</sub>S<sub>4</sub>]</sup>, 2 mM Na<sub>2</sub>SO<sub>3</sub>, 2 mM Eu<sup>II</sup>-EGTA, 5 mM SAM, 10% (v/v) glycerol and 50 mM Tris-HCl (pH 8.0) into a 50- $\mu$ L *N*-methylformamide (NMF) solution containing 2.5 mM 1,4-benzenedithiol using a protocol adapted from a previously described procedure.<sup>11</sup> The same protocol was used to prepare an NMF extract from a “-SAM, +SO<sub>3</sub><sup>2-</sup>” control containing the same components except for the absence of SAM (*see* Fig. 3a, *right*). The cluster extract was then mixed with 10 nmol NifEN<sup>apo</sup> in 1 mL buffer containing 2 mM DT and 50 mM Tris-HCl (pH 8.0), concentrated to 450  $\mu$ L, and mixed with 22 nmol NifH<sup>holo</sup> and 2 nmol NifDK<sup>apo</sup> in 900  $\mu$ L buffer containing 20 mM DT, 0.5 mM homocitrate, 0.25 mM Na<sub>2</sub>MoO<sub>4</sub>, 0.8 mM Na<sub>2</sub>ATP, 1.7 mM MgCl<sub>2</sub>, 10 mM creatine phosphate, 8 units of creatine phosphokinase, and 50 mM Tris-HCl (pH 8.0). This reaction mixture was incubated at 30°C for 30 min and examined for enzymatic activities as described earlier.<sup>4</sup>

**Acid Quench Experiments.** A published method was adapted for the *Ma*NifB<sup>[Fe<sub>4</sub>S<sub>4</sub>]</sup>-dependent formation of methanethiol.<sup>12</sup> These assays were carried out under 100% Ar in 400- $\mu$ L sealed glass vials. Each assay contained, in a total volume of 100  $\mu$ L, 50 mM 10 nmol DT-free NifB<sup>[Fe<sub>4</sub>S<sub>4</sub>]</sup>, 2 mM Eu<sup>II</sup>-EGTA, 200 nmol SAM, 200 nmol or no Na<sub>2</sub>SO<sub>3</sub>, 10% (v/v) glycerol, 50 mM Tris-HCl (pH 8.0) (*see* Supplementary Fig. 3). The reaction mixture was incubated at 25°C for 30 min before being quenched by addition of 25  $\mu$ L HCl (1 M). To detect the volatile methanethiol (boiling point: 6°C), the acid-quenched sample was incubated at 60°C for 15 min and equilibrated at room temperature for 15 min before 100  $\mu$ L headspace of the assay vial was injected onto an Rxi-1ms column (0.32 mm diameter, 30 m length, 4  $\mu$ m film thickness; Restek) in a TRACE 1300 gas chromatograph equipped with an ISQ-QD single

quadrupole mass spectrometer (Thermo Scientific). The column was held at 30°C for 8 min, heated up to 200°C at 40°C/min, held at 200°C for 1min, and cooled down to 30°C. The gas chromatograph-mass spectrometry (GC-MS) full scan spectra were generated from a mass range between  $m/z = 43.00$  and  $m/z = 55.00$ . Total ion chromatograms were generated under SIM condition with  $m/z = 47.00$ . To determine the amounts of methanethiol in samples, aqueous solutions of sodium methanethiolate were prepared at 0, 40, 80, and 160  $\mu\text{M}$  and quenched by the same procedure applied to the samples. Approximately 40% (4 nmol) of the theoretical yield of methanethiol was detected in the assay.

### Supplementary References

1. Averill, B. A., Herskovitz, T., Holm, R. H. & Ibers, J. A. Synthetic analogs of the active sites of iron-sulfur proteins. II. Synthesis and structure of the tetra(mercapto- $\mu_3$ -sulfido-iron) clusters,  $(\text{Fe}_4\text{S}_4(\text{SR})_4)^{2-}$ . *J. Am. Chem. Soc.* **95**, 3523–3534 (1973).
2. Barclay, J. E., Davies, S. C., Evans, D. J. & Hughes, D. L. Lattice effects in the Mössbauer spectra of salts of  $[\text{Fe}_4\text{S}_4\{\text{S}(\text{CH}_2)_n\text{OH}\}_4]^{2-}$ . Crystal structures of  $[\text{PPh}_4]_2[\text{Fe}_4\text{S}_4\{\text{S}(\text{CH}_2)_n\text{OH}\}_4]$  ( $n=2, 3$  and  $4$ ). *Inorg. Chim. Acta.* **291**, 101–108 (1999).
3. Vincent, K. A. *et al.* Instantaneous, stoichiometric generation of powerfully reducing states of protein active sites using Eu(II) and polyaminocarboxylate ligands. *Chem. Commun.* **2003**, 2590–2591 (2003).
4. Fay, A. W., Wiig, J. A., Lee, C. C. & Hu, Y. Identification and characterization of functional homologs of nitrogenase cofactor biosynthesis protein NifB from methanogens. *Proc. Nat. Acad. Sci. U.S.A.* **112**, 14829–14833 (2015).
5. Hu, Y., Fay, A. W. & Ribbe, M. W. Identification of a nitrogenase FeMo cofactor precursor on NifEN complex. *Proc. Natl. Acad. Sci. U.S.A.* **102**, 3236–3241 (2005).
6. Ribbe, M. W., Hu, Y., Guo, M., Schmid, B. & Burgess, B. K. The FeMoco-deficient MoFe protein produced by a *nifH* deletion strain of *Azotobacter vinelandii* shows unusual P-cluster features. *J. Biol. Chem.* **277**, 23469–23476 (2002).
7. Christiansen, I. J., Goodwin, P. J., Lanzilotta, W. N., Seefeldt, L. C. & Dean, D. R.



- Catalytic and biophysical properties of a nitrogenase Apo-MoFe protein produced by a *nifB*-deletion mutant of *Azotobacter vinelandii*. *Biochemistry* **37**, 12611–12623 (1998).
8. Burgess, B. K., Jacobs, D. B. & Stiefel, E. I. Large-scale purification of high activity *Azotobacter vinelandii* nitrogenase. *Biochim. Biophys. Acta.* **614**, 196–209 (1980).
  9. Ribbe, M. W., Bursey, E. H. & Burgess, B. K. Identification of an Fe protein residue (Glu146) of *Azotobacter vinelandii* nitrogenase that is specifically involved in FeMo cofactor insertion. *J. Biol. Chem.* **275**, 17631–17638 (2000).
  10. Gavini, N. & Burgess, B. K. FeMo cofactor synthesis by a *nifH* mutant with altered MgATP reactivity. *J. Biol. Chem.* **267**, 21179–21186 (1992).
  11. Wiig, J. A., Hu, Y., Lee, C. C. & Ribbe, M. W. Radical SAM-dependent carbon insertion into the nitrogenase M-cluster. *Science* **337**, 1672–1675 (2012).
  12. Wiig, J. A., Hu, Y. & Ribbe, M. W. Refining the pathway of carbide insertion into the nitrogenase M-cluster. *Nat. Commun.* **6**, 8034 (2015).

## Supplementary Figures

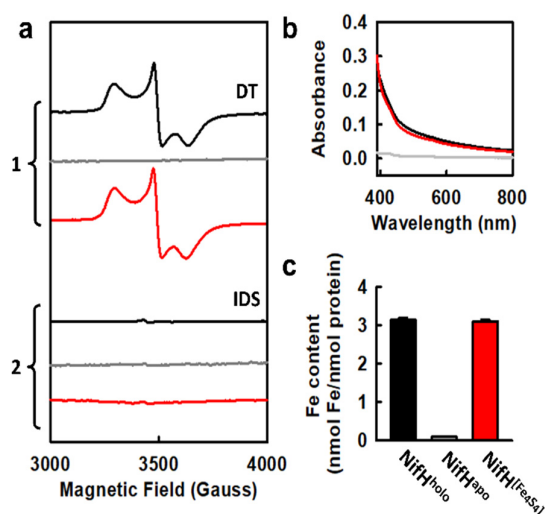

**Supplementary Figure 1. Characterization of NifH<sup>apo</sup> reconstitution.** (a) EPR spectra of NifH<sup>holo</sup> (black), NifH<sup>apo</sup> (gray) and NifH<sup>[Fe<sub>4</sub>S<sub>4</sub>]</sup> (red) in the DT-reduced (1) and IDS-oxidized (2) states. (b) Visible absorption spectra of NifH<sup>holo</sup> (black), NifH<sup>apo</sup> (gray) and NifH<sup>[Fe<sub>4</sub>S<sub>4</sub>]</sup> (red). (c) Fe content of NifH<sup>holo</sup> (black), NifH<sup>apo</sup> (gray) and NifH<sup>[Fe<sub>4</sub>S<sub>4</sub>]</sup> (red) as determined by ICP-OES.

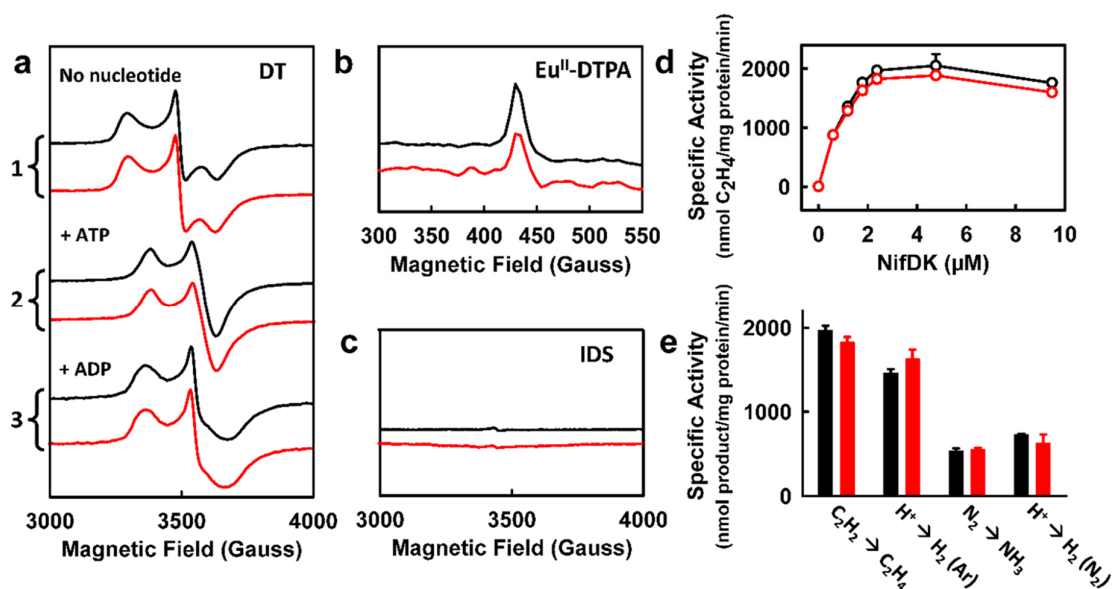

**Supplementary Figure 2. Characterization of NifH<sup>[Fe<sub>4</sub>S<sub>4</sub>]</sup>.** (a-c) EPR spectra of NifH<sup>holo</sup> (black) and NifH<sup>[Fe<sub>4</sub>S<sub>4</sub>]</sup> (red) in the presence of DT (a), Eu<sup>II</sup>-DTPA (b) and IDS (c). DT-reduce samples contained no nucleotide (a, 1), ATP (a, 2) or ADP (a, 3). (d) Catalytic profiles of NifH<sup>holo</sup> (black) and NifH<sup>[Fe<sub>4</sub>S<sub>4</sub>]</sup> (red) titrated with increasing amounts of NifDK<sup>holo</sup>. (e) Activities of C<sub>2</sub>H<sub>2</sub>-, H<sup>+</sup>- and N<sub>2</sub>-reduction by NifDK<sup>holo</sup> when combined with NifH<sup>holo</sup> (black) or NifH<sup>[Fe<sub>4</sub>S<sub>4</sub>]</sup> (red).

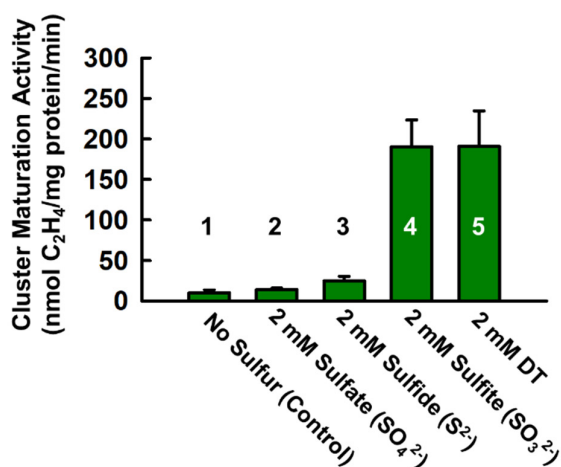

**Supplementary Figure 3. Identification of the origin of the ‘9th S’.** Activities of substrate reduction by *MaNifB*<sup>[Fe<sub>4</sub>S<sub>4</sub>]</sup> treated with (1) no sulfur, (2) 2 mM MgSO<sub>4</sub>, (3) 2 mM Na<sub>2</sub>S, (4) 2 mM Na<sub>2</sub>SO<sub>3</sub>, and (5) 2 mM DT, after maturation and transfer of clusters to NifDK. Assays 1-4 were conducted in 2 mM Eu<sup>II</sup>-EGTA, and assay 5 contained 2 mM DT.

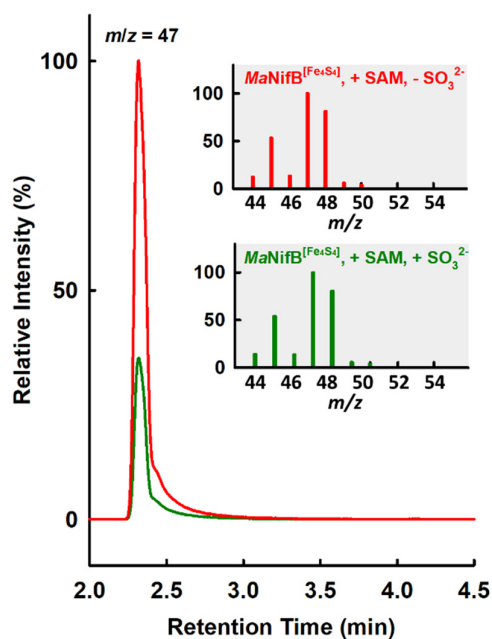

**Supplementary Figure 4. Formation of methanethiol by acid-quenched *MaNifB*<sup>[Fe<sub>4</sub>S<sub>4</sub>]</sup>.** GC-MS full scans (inset) and SIM ( $m/z=47$ ) analyses of acid-quenched incubation mixtures containing *MaNifB*<sup>[Fe<sub>4</sub>S<sub>4</sub>]</sup> and SAM in the absence (red) or presence (green) of SO<sub>3</sub><sup>2-</sup>. Both assays contained 2 mM Eu<sup>II</sup>-EGTA. The acid-quenched product was identified as methanethiol based on its GC-MS retention time and fragmentation pattern.

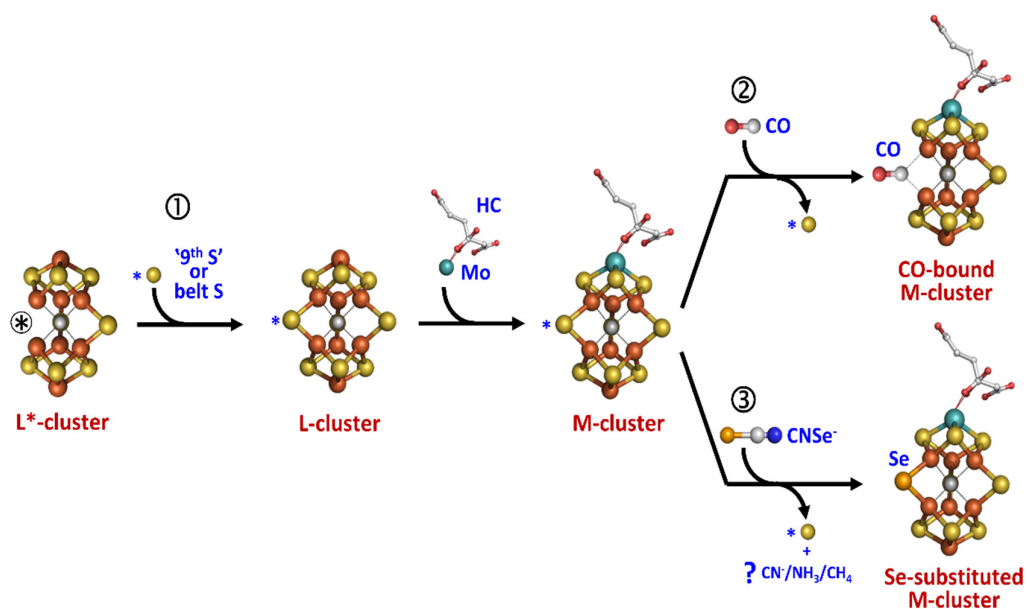

**Supplementary Figure 5. Fate of the ‘9<sup>th</sup> S’ in assembly and catalysis.** Comparison of the insertion of the ‘9<sup>th</sup> S’ as a belt S during M-cluster assembly ① with the replacement of a belt S of the M-cluster by CO ② or Se ③ under turnover conditions. The apparent analogy between these events suggests the possibility to specifically label the ‘9<sup>th</sup> S’ for tackling the reactive Fe sites coordinated by this atom during catalysis. The encircled black asterisk (\*) in the L\*-cluster denotes potential ligand binding site. The blue asterisks in the L- and M-clusters denote the incorporated ‘9<sup>th</sup> S’.

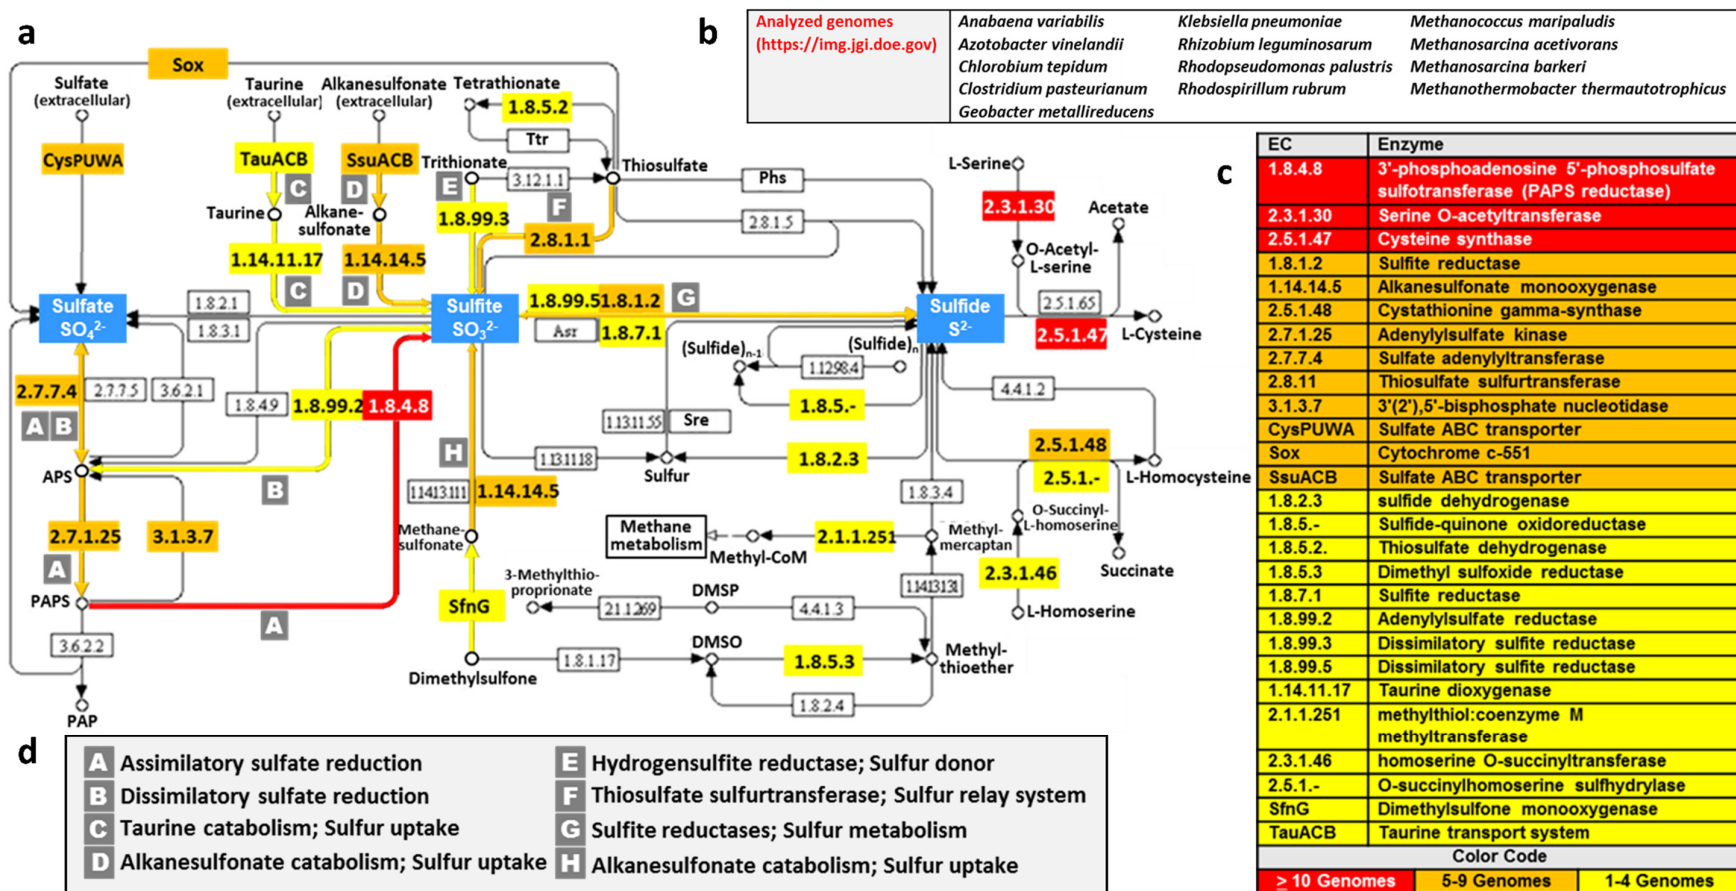

**Supplementary Figure 6. Analysis of sulfur metabolism of selected nitrogen fixing microbes.** (a) Pathways of sulfur metabolism in the cell, where sulfate, sulfite and sulfide are three major metabolites. The map of sulfur metabolism was rendered at JGI (<http://img.jgi.doe.gov>). (b) 13 nitrogen-fixing (diazotrophic) organisms analyzed for genes encoding enzymes involved in sulfur metabolism. (c) Genes encoding sulfur-metabolizing enzymes identified in  $\geq 10$  (red), 5-9 (orange) or 1-4 (yellow) of the 13 selected genomes of diazotrophic organisms. (d) Sulfite-generating pathways utilizing enzymes encoded by genes identified in the 13 selected genomes of diazotrophic organisms. Note that the sulfite-generating pathway involving the PAPS reductase (a, red arrow) is the most predominant among the 13 selected organisms based on genomic analyses.
